# Supplementary material
Source: PubMed Central journal article supplement (PMC11040401)
Supplement: jama-e242103-s002.pdf [file jama-e242103-s002.pdf]

## Data Sharing Statement

Fang. Prevalence of Type 1 Diabetes Among US Children and Adults by Age, Sex, Race, and Ethnicity. *JAMA*. Published April 04, 2024. doi:10.1001/jama.2024.2103

### Data

**Data available:** Yes

**Data types:** Deidentified participant data

**How to access data:** <https://www.cdc.gov/nchs/nhis/2022nhis.htm>

**When available:** With publication

### Supporting Documents

**Document types:** None

### Additional Information

**Who can access the data:** These data are publicly available

**Types of analyses:** For any purpose

**Mechanisms of data availability:** The data are available on the CDC website
